# Supplementary material for: Attention behaviours but not pain-related behaviours are modified by the presence of a twin in lambs undergoing castration by rubber ring
Source: PeerJ. 2020 Oct 6;8:e10081. doi: 10.7717/peerj.10081 (PMC7546243; doi:10.7717/peerj.10081)
Supplement: Supplemental Information 1 — Treatment codes are C (castrate) and S (sham, on non-castrate), in homogeneous (CC/SS) or heterogeneous (SC/CS) groupings. Behaviour codings are described in tables 1 and 2 [file peerj-08-10081-s001.xlsx]

## Sheet: Pain
Tag No.	Coh	Pen	Lamb ID	Wt	Treatment	NU	AU	NL	AL	LL	Rst	FSK	rl	Jmp	LBW	Sh	EQ	Pain beh
14C8195	1	34	Red X	14.9	CC	14	1	9	6	0	13	0	0	0	2	1	2	18
14C8210	1	34	Blue O	14.3	CC	9	1	8	6	0	15	0	0	0	4	0	1	20
14C8229	1	34	Green -	18.8	CC	17	0	15	8	0	21	7	0	0	0	1	1	30
14C8180	1	34	None	17.1	CC	24	5	25	7	0	29	6	0	0	7	0	1	43
14C8110	2	35	None	20.9	CC	13	2	5	11	5	23	4	0	0	10	0	0	37
14C8134	2	35	Red X	20.4	CC	22	3	12	16	6	28	24	0	0	0	0	1	53
14C8111	2	35	Green -	20.4	CC	31	5	22	17	4	32	14	0	0	13	0	0	59
14C8133	2	35	Blue O	19.8	CC	26	2	22	15	0	30	17	0	0	8	2	3	60
14C8172	3	30	Red X	18.1	CC	16	2	14	6	0	16	0	0	0	6	0	0	22
14C8171	3	30	Blue O*	18	CC	16	4	18	12	0	26	2	0	0	8	1	3	40
14C8224	3	30	None	17.6	CC	37	6	32	12	1	42	18	0	0	12	1	2	75
14C8179	3	30	Green -	16.2	CC	63	11	70	24	0	74	27	0	0	15	0	5	121
14C8096	1	35	Green -	16.6	CS	24	4	14	17	0	24	1	0	0	6	0	7	38
14C8237	1	35	Red X	16.2	CS	17	4	16	8	0	18	2	0	0	5	0	0	25
14C8176	1	36	Blue O	15.9	CS	13	1	8	4	0	14	3	0	0	1	0	3	21
14C8099	1	36	None	18.9	CS	14	1	8	8	0	13	0	0	0	5	0	0	18
14C8075	2	30	Red X	18.1	CS	30	2	31	9	1	34	14	1	0	2	0	1	52
14C8035	2	36	Blue O	18	CS	33	0	20	16	0	34	11	0	0	2	0	2	49
14C8016	2	36	None	22.2	CS	17	6	13	11	1	16	13	0	0	0	1	1	31
14C8062	2	30	Green -	21.1	CS	10	3	9	3	0	10	2	0	0	0	0	1	13
14C8174	3	35	Blue O	15	CS	50	8	30	27	1	49	37	0	0	3	0	2	91
14C8071	3	34	Blue O	23.3	CS	38	2	26	15	0	41	18	0	0	6	1	0	66
14C8012	3	35	Purple -	22.7	CS	26	5	24	2	0	35	2	0	0	7	1	2	47
14C8123	3	34	Purple -	17.3	CS	15	1	14	9	0	20	12	0	0	4	0	1	37
14C8239	1	35	Blue O	13.9	SC	1	0	0	0	0	0	0	0	0	0	0	0	0
14C8191	1	36	Red X	15.1	SC	1	0	0	0	0	0	0	0	0	0	0	0	0
14C8100	1	36	Green -	15.6	SC	1	0	0	0	0	0	0	0	0	0	0	1	1
14C8097	1	35	None	18.9	SC	2	0	1	0	0	1	0	0	0	1	0	0	2
14C8036	2	36	Red X	20.1	SC	1	0	0	0	0	0	0	0	0	0	0	0	0
14C8061	2	30	None	21.7	SC	1	0	0	0	0	0	0	0	0	0	0	0	0
14C8017	2	36	Green -	22.7	SC	1	0	0	0	0	0	0	0	0	0	0	1	1
14C8076	2	30	Blue O	21.4	SC	1	0	0	0	0	0	0	0	0	1	0	0	1
14C8070	3	34	None	22.1	SC	1	0	1	0	0	1	0	0	0	0	0	0	1
14C8011	3	35	Green -	23	SC	1	0	0	0	0	0	0	0	0	1	0	0	1
14C8122	3	34	Red X	13.8	SC	2	0	2	0	0	1	0	0	0	1	0	0	2
14C8178	3	35	Red X	13.3	SC	1	0	0	0	0	0	1	0	0	1	0	1	3
14C8122	1	30	Red X	13.8	SS	1	0	1	0	0	0	0	0	0	1	0	0	1
14C8224	1	30	None	17.6	SS	1	0	1	0	0	0	1	0	0	0	0	0	1
14C8123	1	30	Blue O	17.3	SS	1	0	1	0	0	0	0	0	0	2	0	0	2
14C8179	1	30	Green -	16.2	SS	3	0	2	0	0	2	0	0	0	0	0	1	3
14C8172	2	34	Red X	18.1	SS	1	0	0	0	0	0	0	0	0	0	0	0	0
14C8070	2	34	None	22.1	SS	1	0	0	0	0	0	0	0	0	0	0	0	0
14C8171	2	34	Green -	18	SS	1	0	0	0	0	0	1	0	0	0	0	0	1
14C8071	2	34	Blue O	23.3	SS	1	0	0	0	0	0	0	0	0	0	0	2	2
14C8220	3	36	Red *	11.8	SS	1	0	1	0	0	0	0	0	0	1	0	1	2
14C8018	3	36	Blue -	25	SS	1	0	1	0	0	0	0	0	0	1	1	0	2
14C8231	3	36	Green V	14.5	SS	1	0	0	0	0	0	1	0	0	2	0	0	3
14C8019	3	36	Purple O	21.8	SS	1	0	1	0	0	0	0	0	0	8	0	0	8

## Sheet: Visual
Tag No.	Coh	Pen	Lamb ID	Wt	Treatment	T→Ewe	T→Twin	T→Tail	T→Others	Changes
14C8195	1	34	Red X	14.9	CC	118	30	3	209	33
14C8210	1	34	Blue O	14.3	CC	25	57	28	250	25
14C8229	1	34	Green -	18.8	CC	89	28	0	243	36
14C8180	1	34	None	17.1	CC	58	26	7	269	37
14C8110	2	35	None	20.9	CC	49	32	0	279	23
14C8134	2	35	Red X	20.4	CC	25	51	6	278	33
14C8111	2	35	Green -	20.4	CC	105	27	5	223	38
14C8133	2	35	Blue O	19.8	CC	70	76	8	206	43
14C8172	3	30	Red X	18.1	CC	57	26	12	265	33
14C8171	3	30	Blue O*	18	CC	39	35	0	286	18
14C8224	3	30	None	17.6	CC	85	56	19	200	49
14C8179	3	30	Green -	16.2	CC	51	66	8	235	41
14C8096	1	35	Green -	16.6	CS	104	11	9	236	37
14C8237	1	35	Red X	16.2	CS	77	21	0	262	23
14C8176	1	36	Blue O	15.9	CS	61	41	0	258	32
14C8099	1	36	None	18.9	CS	155	20	3	182	39
14C8075	2	30	Red X	18.1	CS	109	27	4	220	39
14C8035	2	36	Blue O	18	CS	60	13	9	278	28
14C8016	2	36	None	22.2	CS	60	14	0	286	38
14C8062	2	30	Green -	21.1	CS	64	35	0	261	45
14C8174	3	35	Blue O	15	CS	64	31	5	260	40
14C8071	3	34	Blue O	23.3	CS	109	15	2	234	40
14C8012	3	35	Purple -	22.7	CS	28	37	8	287	34
14C8123	3	34	Purple -	17.3	CS	39	16	2	303	26
14C8239	1	35	Blue O	13.9	SC	78	38	0	244	24
14C8191	1	36	Red X	15.1	SC	17	19	0	324	16
14C8100	1	36	Green -	15.6	SC	107	57	4	192	37
14C8097	1	35	None	18.9	SC	76	10	9	265	20
14C8036	2	36	Red X	20.1	SC	49	28	0	283	46
14C8061	2	30	None	21.7	SC	33	6	2	319	20
14C8017	2	36	Green -	22.7	SC	72	15	0	273	42
14C8076	2	30	Blue O	21.4	SC	50	35	0	275	32
14C8070	3	34	None	22.1	SC	95	21	0	244	30
14C8011	3	35	Green -	23	SC	18	29	1	312	17
14C8122	3	34	Red X	13.8	SC	44	55	0	261	28
14C8178	3	35	Red X	13.3	SC	29	20	2	309	21
14C8122	1	30	Red X	13.8	SS	14	48	0	298	7
14C8224	1	30	None	17.6	SS	40	4	0	316	17
14C8123	1	30	Blue O	17.3	SS	43	18	2	297	14
14C8179	1	30	Green -	16.2	SS	104	0	0	256	19
14C8172	2	34	Red X	18.1	SS	57	32	0	271	27
14C8070	2	34	None	22.1	SS	67	17	0	276	34
14C8171	2	34	Green -	18	SS	22	5	0	333	10
14C8071	2	34	Blue O	23.3	SS	61	2	0	297	11
14C8220	3	36	Red *	11.8	SS	19	15	0	326	16
14C8018	3	36	Blue -	25	SS	78	14	0	268	14
14C8231	3	36	Green V	14.5	SS	24	36	0	300	21
14C8019	3	36	Purple O	21.8	SS	74	25	2	259	22
